# Supplementary material for: Endogenous renal adiponectin drives gluconeogenesis through enhancing pyruvate and fatty acid utilization
Source: PubMed Central journal article supplement (PMC10582045; doi:10.1038/s41467-023-42188-4), 2023-10-17
Supplement: 41467_2023_42188_MOESM3_ESM.pdf [file 41467_2023_42188_MOESM3_ESM.pdf]

## **Description of Additional Supplementary Files**

Title: Supplementary Data 1

Description: We semi-quantitatively analyzed lipid species distribution considering 17117 lipid ID species at 25  $\mu\text{m}$  spatial resolution through the entire kidney section by IMAGEREVEAL™ MS software (Shimadzu Corporation).

We selected 3 areas of cortex, transition and medulla in each section based on the anatomical structure and compared "3 Control vs 3 KSPAPN" and "3 Control vs 3 KSPAKO".
